# Supplementary material for: De novo prediction of RNA–protein interactions from sequence information
Source: Royal Society of Chemistry journal article supplement (doi:10.1039/c2mb25292a), 2012-10-11
Supplement: c2mb25292a.pdf [file c2mb25292a.pdf]

# Supplementary Materials

## De novo prediction of non-coding RNA-protein interactions

*Ying Wang, Xiaowei Chen, Zhi-Ping Liu, Qiang Huang, Yong Wang, Derong Xu, Xiang-Sun Zhang, Runsheng Chen and Luonan Chen*

### *Contents*

**Supplementary Table 1.** The NPInter data set.

**Supplementary Table 2.** The features enriched in the positive samples for  $k=3$ .

**Supplementary Table 3.** The features enriched in the negative samples for  $k=3$ .

**Supplementary Table 4.** The results of NB classifier and ENB classifier for a balanced positive and negative sample set.

**Supplementary Table 5.** The list of 759 proteins for the prediction of interactions with 30 ncRNAs in worm.

**Supplementary Table 6.** The predicted interactions for 30 ncRNAs and 759 proteins using ENB classifier trained on RPI369.

**Supplementary Table 7.** The predicted interactions for 30 ncRNAs and 759 proteins using ENB classifier trained on RPI2241.

*The supplementary materials are also available at our website:*

<http://doc.aporc.org/wiki/NCRNAP>
